# Supplementary material for: Stability of clinical prediction models developed using statistical or machine learning methods
Source: PubMed Central journal article supplement (PMC10952221; doi:10.1002/bimj.202200302), 2023-07-19
Supplement: BIMJ-65-0-s002.pdf [file BIMJ-65-0-s002.pdf]

## SUPPLEMENTARY MATERIAL

Figure S1: Each plot shows instability of calibration curves for 1000 example models developed using a particular sample size (100, 200, 500, 888, 1000 or 5000) when each model is applied to the same population of 100000 individuals: each example model was produced from a logistic regression (LR) with either a full model with no penalisation ('unshrunk LR'), a full model followed by a uniform shrinkage ('shrunk LR'), or with a LASSO penalty fitted to a different random sample of individuals from a population with a true overall risk of 0.5, based on a true model with a linear prediction of  $LP = 0.5X_1 + 0.3X_2 + 0.3X_3 + 0.25X_4 + 0.25X_5 + 0(Z_1 + \dots + Z_{10})$  where  $X_1, \dots, X_5 \sim N(0,1)$  and 10 noise variables ( $Z_1, \dots, Z_{10} \sim N(0,1)$ ).

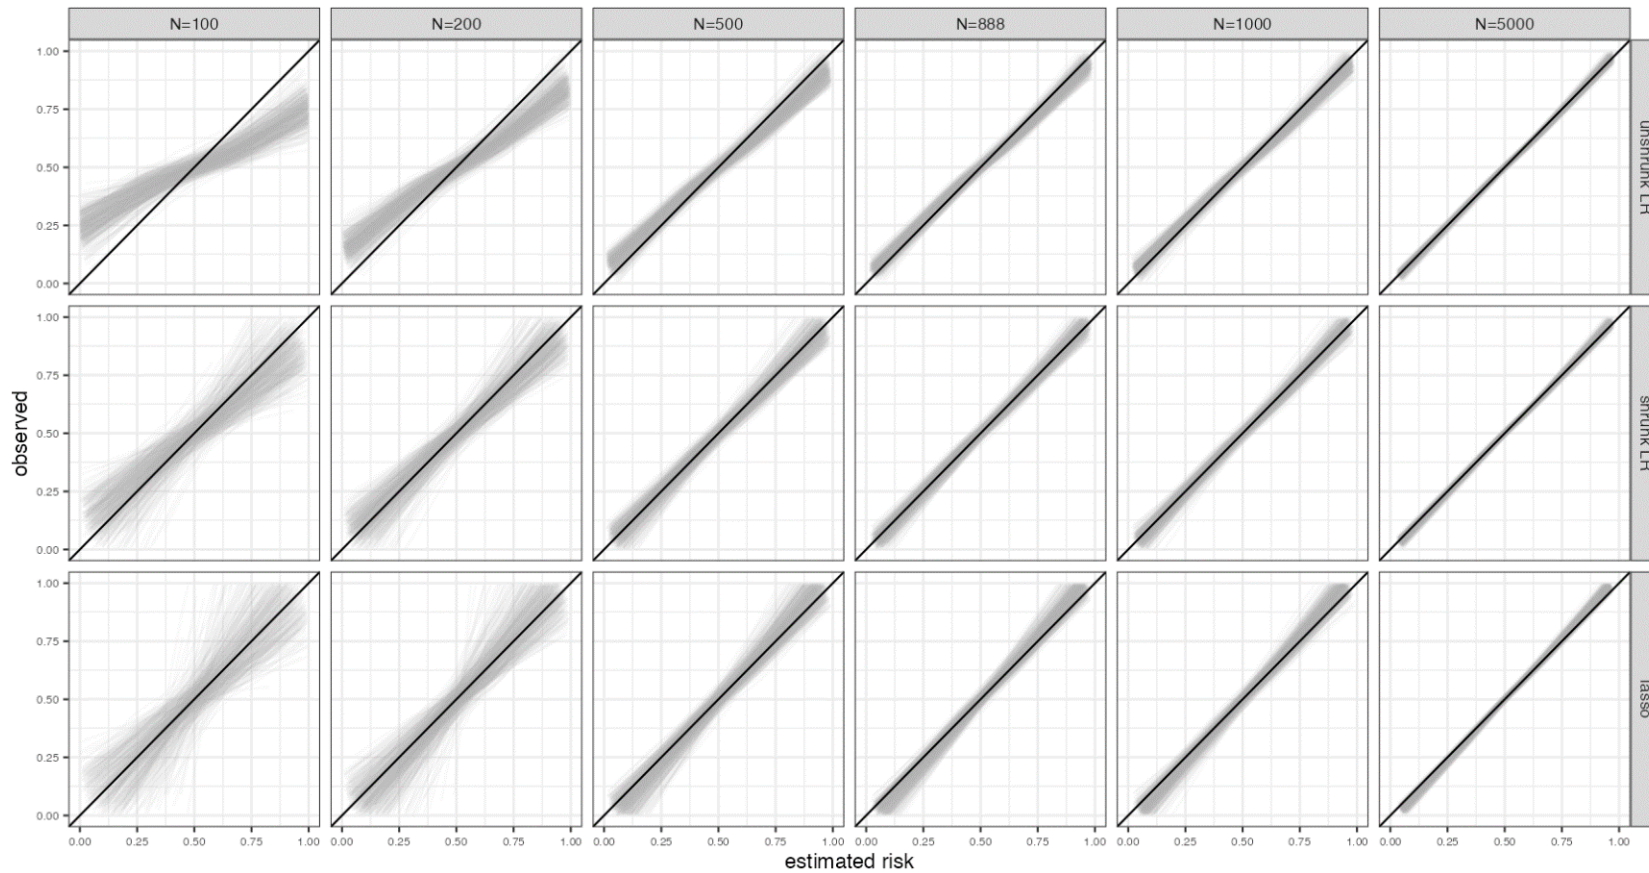

Figure S2: Instability plots and measures for three prediction models developed using 752 participants (53 events) and 7 candidate predictors (see Sections 4.3 and 4.4)

|                             | (a) logistic regression with LASSO | (a) unpenalised logistic regression followed by uniform shrinkage of predictor effects | (c) Random forest (100 trees, unlimited depth) |
|-----------------------------|------------------------------------|----------------------------------------------------------------------------------------|------------------------------------------------|
| Prediction instability plot |                                    |                                                                                        |                                                |
| MAPE instability plot       |                                    |                                                                                        |                                                |
| Average MAPE                | 0.019                              | 0.018                                                                                  | 0.047                                          |

Figure S3: Instability plots and measures for a prediction model developed using random forest (7 predictors) in 752 participants, using a variety of hyperparameter tuning options of (a) software defaults, (b) defaults but with tree depth of 3, and (c) allowing tuning to be tailored

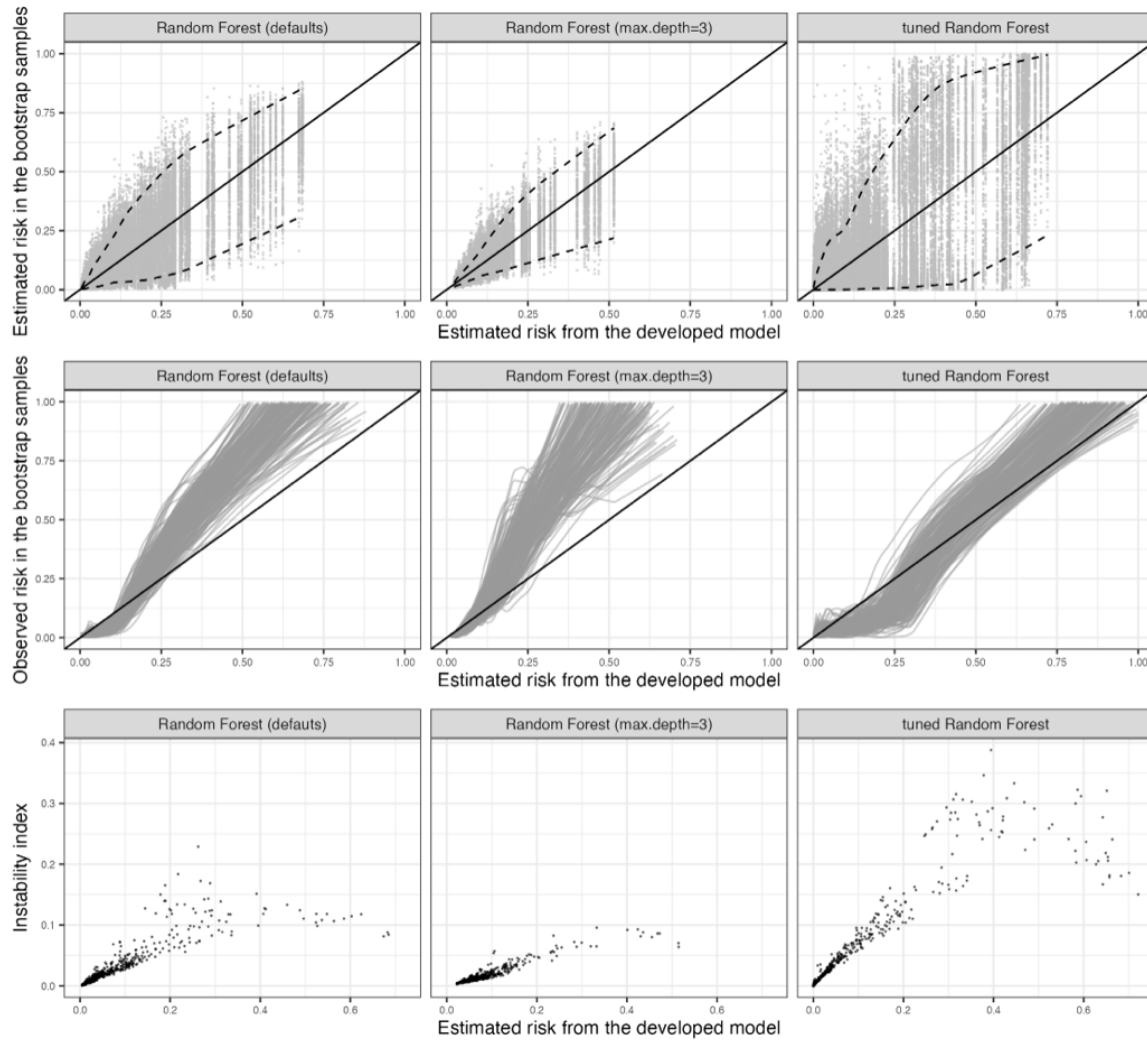

**Figure S4: Instability plots and measures for a prediction model developed using random forest (7 predictors, 100 trees, depth 3) in 452 participants, followed by recalibration in 300 participants**

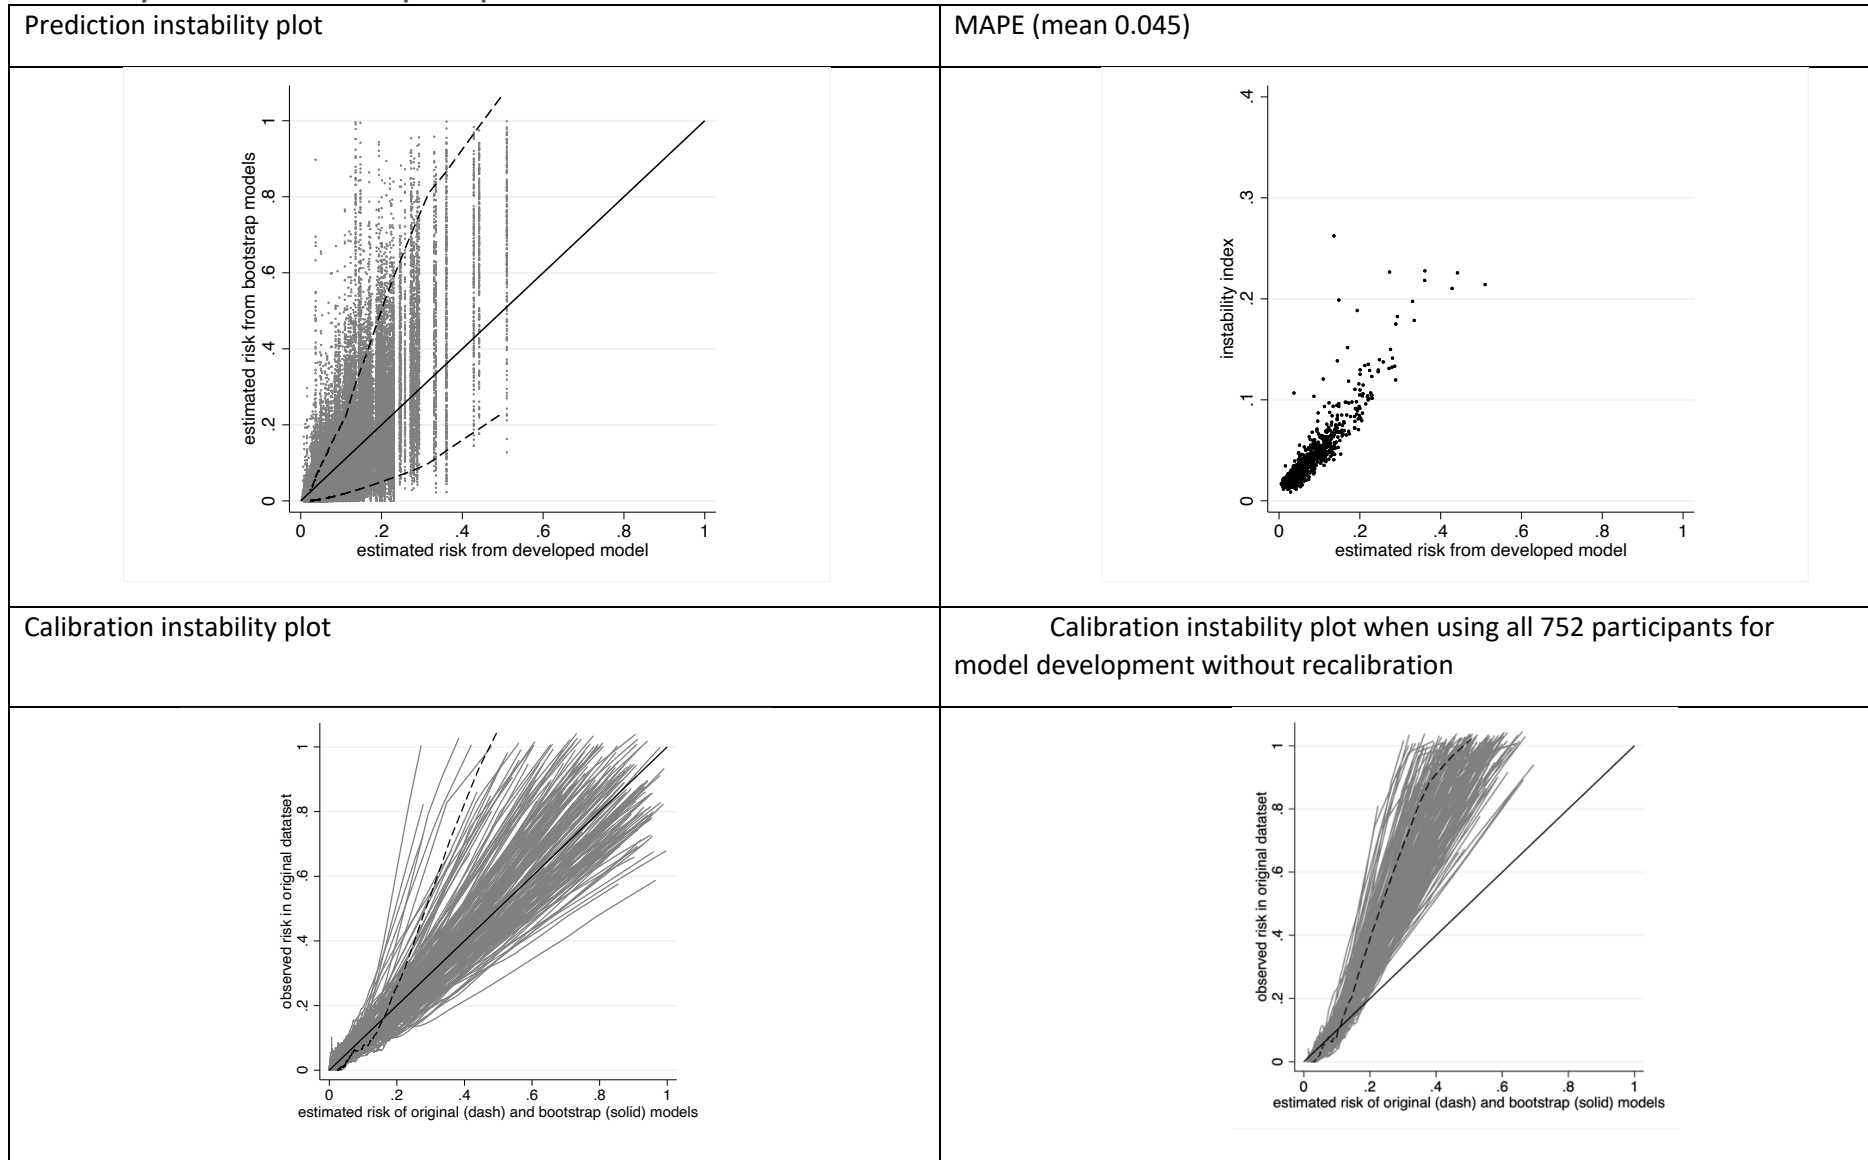

Figure S5: Instability plots and measures to examine fairness of a LASSO prediction model in males and females separately (see Section 5.1)

|                             | Males | Females |
|-----------------------------|-------|---------|
| Prediction instability plot |       |         |
| MAPE instability plot       |       |         |
| Average MAPE                | 0.017 | 0.027   |

Figure S6: Histogram of C-statistics from applying the LASSO model in Section 5.2 to the bootstrap samples

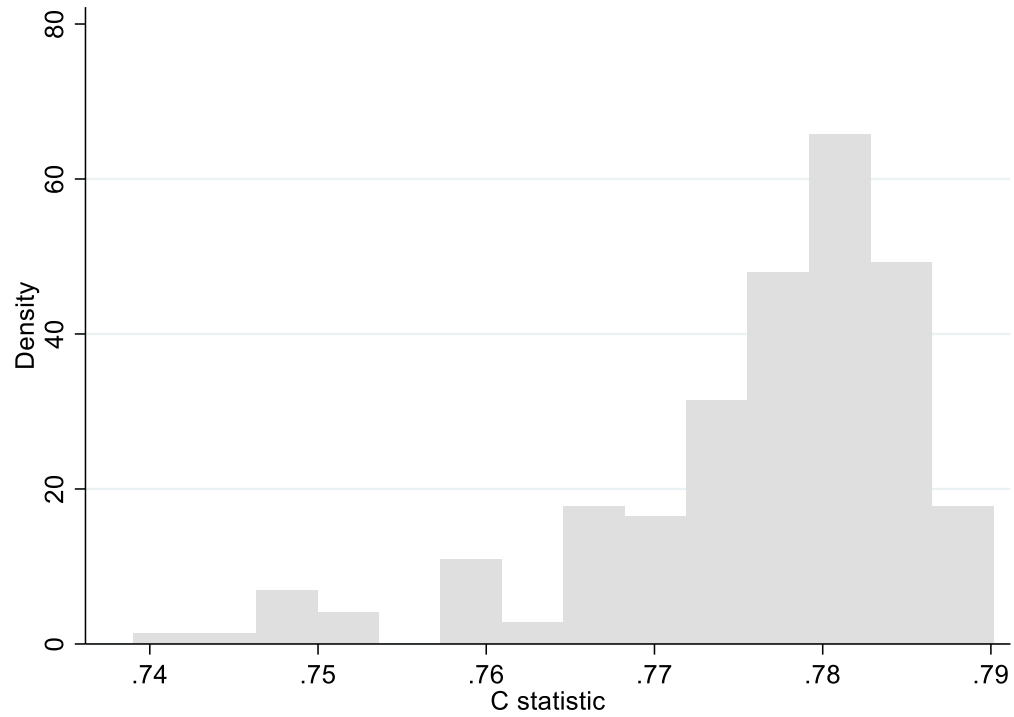

**Figure S7: Classification instability plots for various models from the case studies of Section 4.**

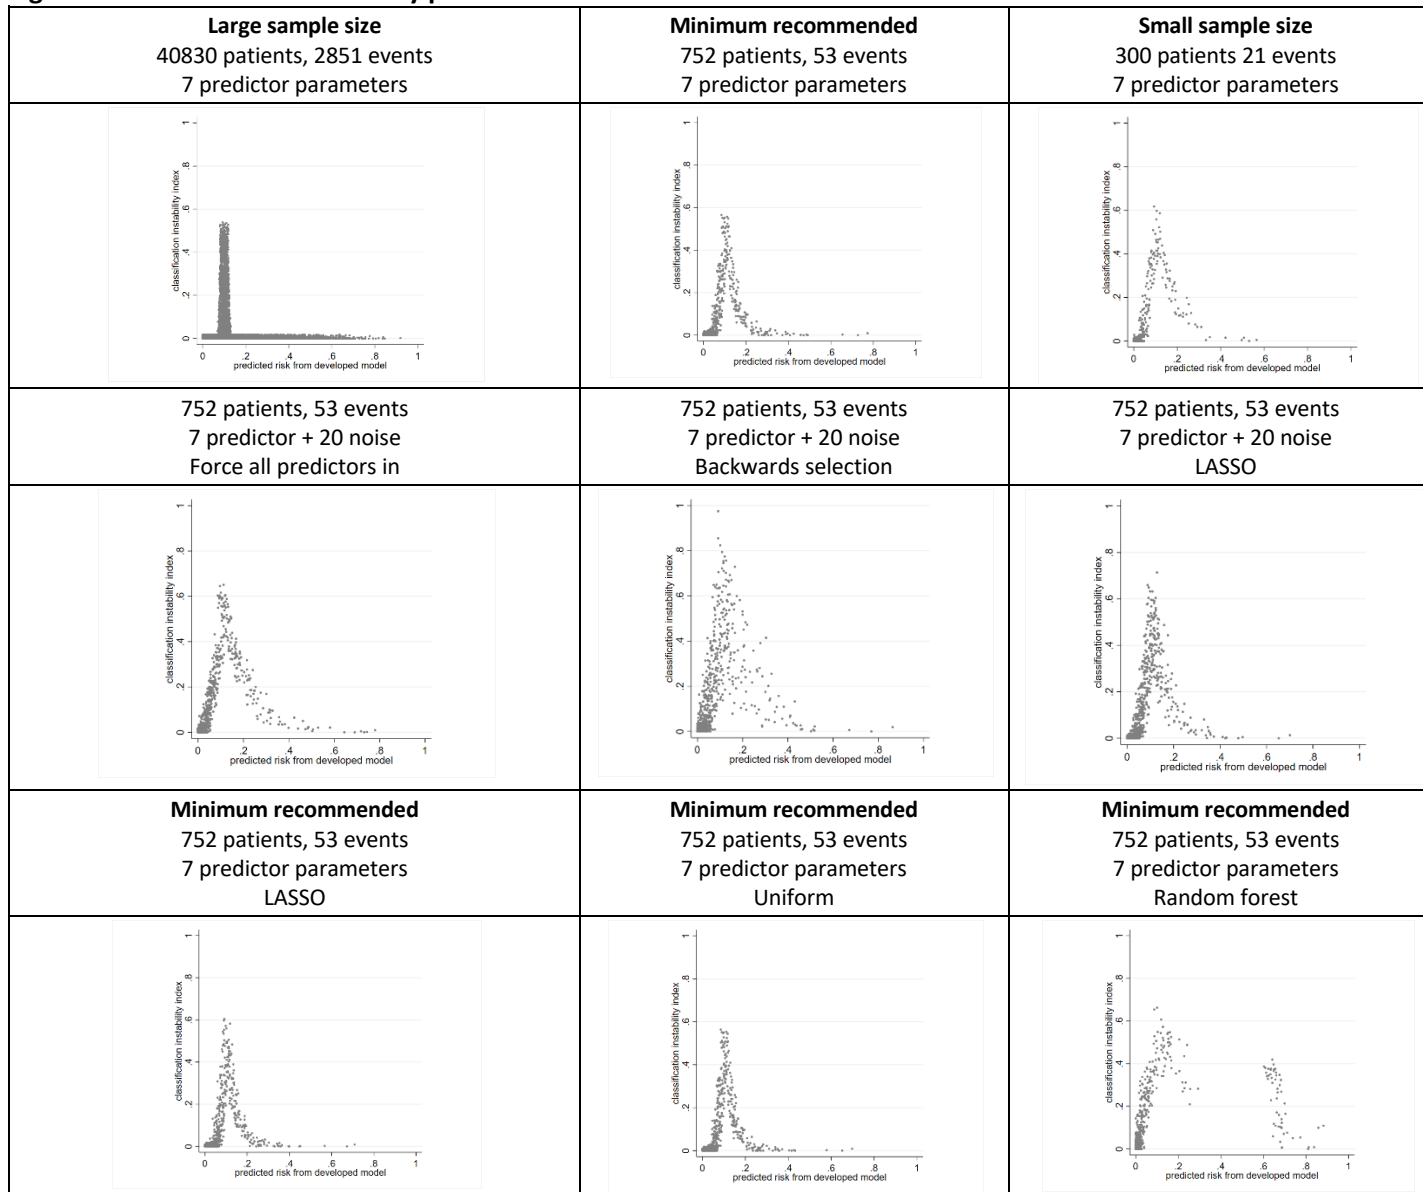

| <p><b>Minimum recommended</b><br/>752 patients, 53 events<br/>7 predictor parameters<br/>LASSO - males</p>                                                                                                                                                                                                                                                                                                                                                                                                                                                                                                                             | <p><b>Minimum recommended</b><br/>752 patients, 53 events<br/>7 predictor parameters<br/>LASSO - females</p>                                                                                                                                                                                                                                                                                                                                                                                                                                                                                                                              |  |
|----------------------------------------------------------------------------------------------------------------------------------------------------------------------------------------------------------------------------------------------------------------------------------------------------------------------------------------------------------------------------------------------------------------------------------------------------------------------------------------------------------------------------------------------------------------------------------------------------------------------------------------|-------------------------------------------------------------------------------------------------------------------------------------------------------------------------------------------------------------------------------------------------------------------------------------------------------------------------------------------------------------------------------------------------------------------------------------------------------------------------------------------------------------------------------------------------------------------------------------------------------------------------------------------|--|
| 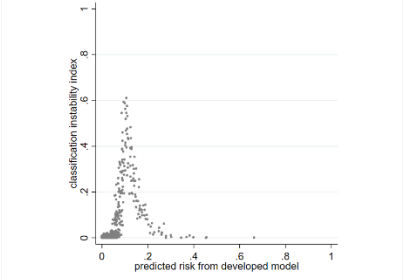 <p>A scatter plot showing the relationship between the predicted risk from a developed model (x-axis) and the classification instability index (y-axis) for males. The x-axis ranges from 0 to 1 with major ticks at 0, 2, 4, 6, 8, and 1. The y-axis ranges from 0 to 1 with major ticks at 0, 2, 4, 6, 8, and 1. The data points are concentrated at low predicted risk values (below 1) and low instability indices (below 0.5), with a few points extending up to a predicted risk of approximately 1 and an instability index of about 0.6.</p> |  <p>A scatter plot showing the relationship between the predicted risk from a developed model (x-axis) and the classification instability index (y-axis) for females. The x-axis ranges from 0 to 1 with major ticks at 0, 2, 4, 6, 8, and 1. The y-axis ranges from 0 to 1 with major ticks at 0, 2, 4, 6, 8, and 1. The data points are concentrated at low predicted risk values (below 1) and low instability indices (below 0.5), with a few points extending up to a predicted risk of approximately 1 and an instability index of about 0.6.</p> |  |
